# Supplementary material
Source: Springer Nature journal article supplement (https://www.springermedizin.de/resource/supplementary/12943_2010_794_MOESM7_ESM.pdf/9554852)

**A**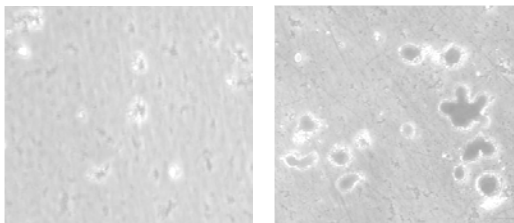

Absorbance at 550nm

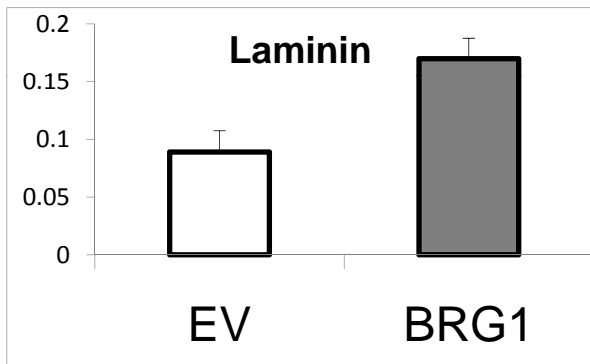**B**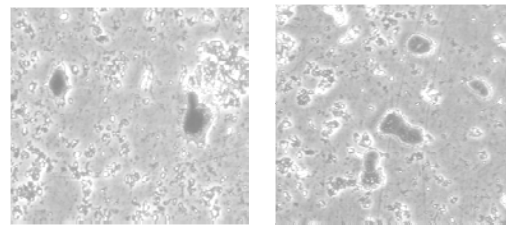

Absorbance at 550nm

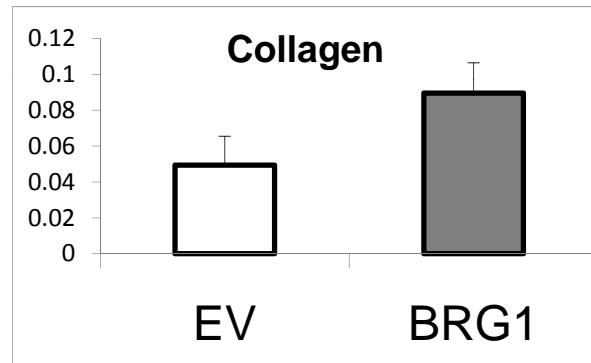**C**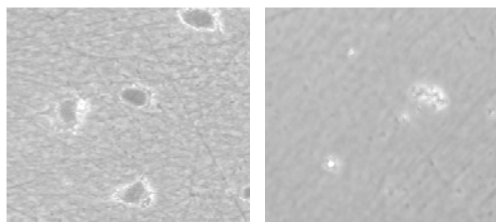

Absorbance at 550nm

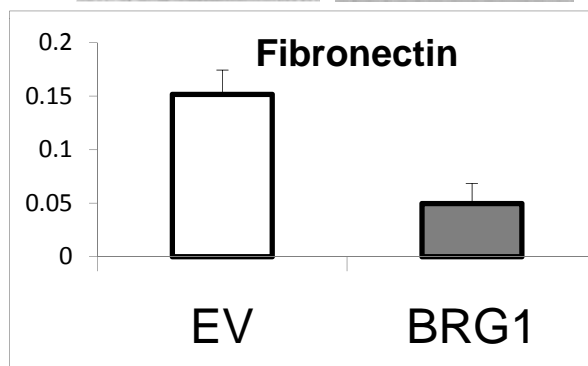

Supplement: MOESM7 [file 9554852]
